# Supplementary material for: Constituents of the Roots of Dichapetalum pallidum and Their Anti-Proliferative Activity
Source: PubMed Central journal article supplement (PMC6154325; doi:10.3390/molecules22040532), 2017-03-27
Supplement: molecules-22-00532-s001.pdf [file molecules-22-00532-s001.pdf]

## Supplementary Data: Constituents of the roots of *Dichapetalum pallidum* and their anti-proliferative activity

Dorcas Osei-Safo, Godwin Akpeko Dziwornu, Regina Appiah-Opong, Mary Anti Chama, Isaac Tuffour, Reiner Waibel, Richard Amewu and Ivan Addae-Mensah

Table of Contents:

**Scheme S1.** Isolation of compounds **1 – 8**

**Figure S1.** The structures of compounds **1 – 8**

**Figure S2.** <sup>1</sup>H-NMR spectrum (600MHz, CDCl<sub>3</sub>, 303K) of compound **1**

**Figure S3.** <sup>13</sup>C-NMR spectrum (150MHz, CDCl<sub>3</sub>, 303K) of compound **1**

**Figure S4.** COSY NMR spectrum (600MHz, CDCl<sub>3</sub>, 303K) of compound **1**

**Figure S5.** HSQC NMR spectrum (600MHz, CDCl<sub>3</sub>, 303K) of compound **1**

**Figure S6.** HMBC NMR spectrum (600MHz, CDCl<sub>3</sub>, 303K) of compound **1**

**Figure S7.** <sup>1</sup>H NMR spectrum (600MHz, CDCl<sub>3</sub>, 303K) of compound **2**

**Figure S8.** <sup>13</sup>C NMR spectrum (150MHz, CDCl<sub>3</sub>, 303K) of compound **2**

**Figure S9.** <sup>1</sup>H NMR spectrum (600MHz, CDCl<sub>3</sub>, 303K) of compound **3**

**Figure S10.** <sup>13</sup>C NMR spectrum (150MHz, CDCl<sub>3</sub>, 303K) of compound **3**

**Figure S11.** IR spectrum of compound **1**

**Table S1.** Jurkat cell viability assay data for compounds **1 - 3**

**Table S2.** HL-60 cell viability assay data for compounds **1 – 3**

**Table S3.** CEM cell viability assay data for compounds **1 – 3**

*D. pallidum* EtOAc extract  
(38.7g)

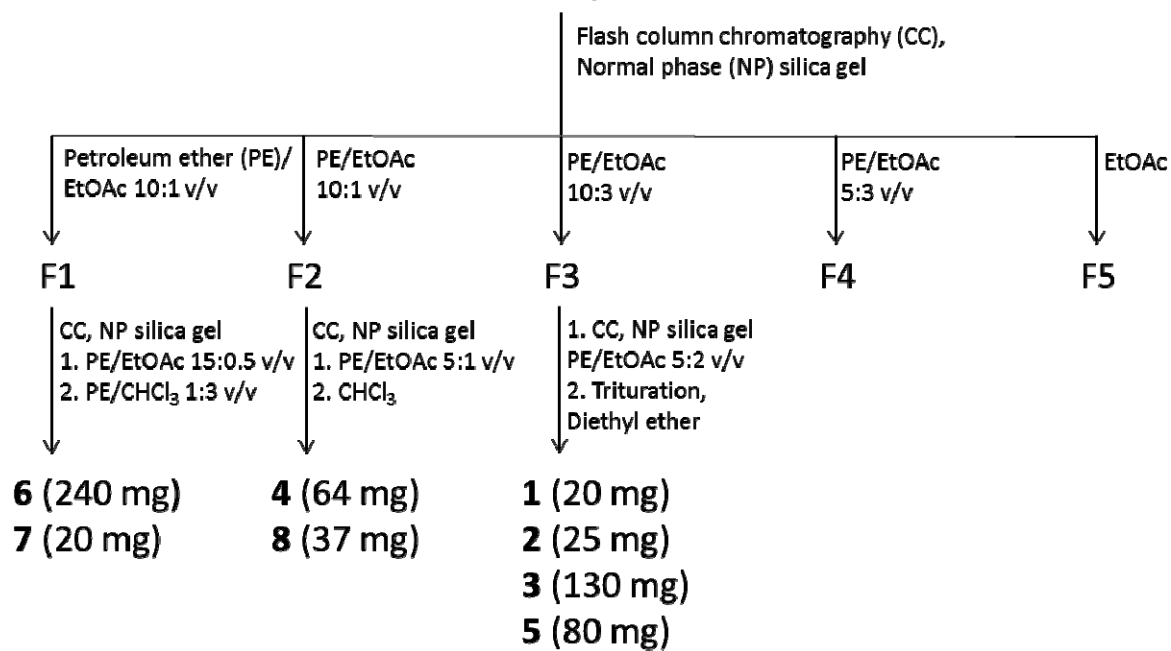

Scheme S1. Isolation of compounds 1 – 8

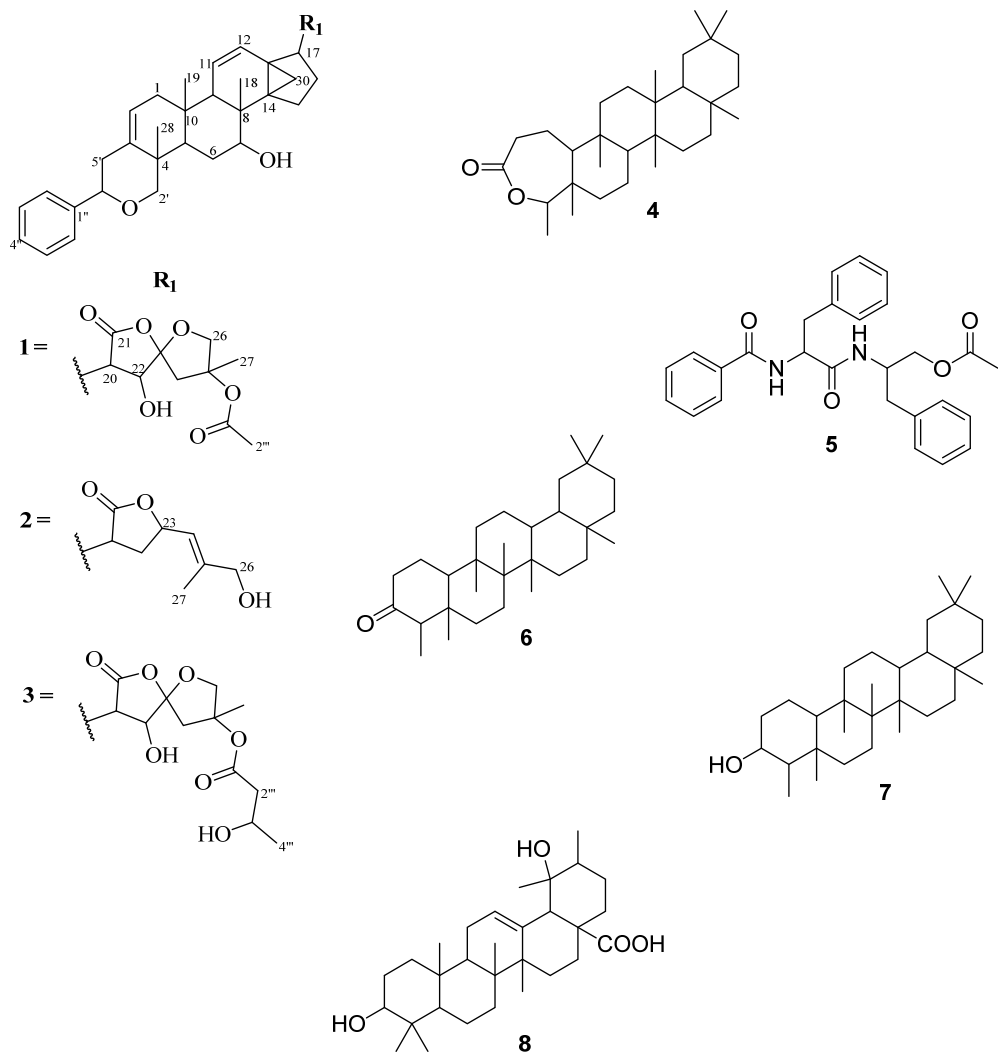

**Figure S1.** The structures of compounds 1 – 8

F3-S3 in CDCl<sub>3</sub>, 1H

Compound 1

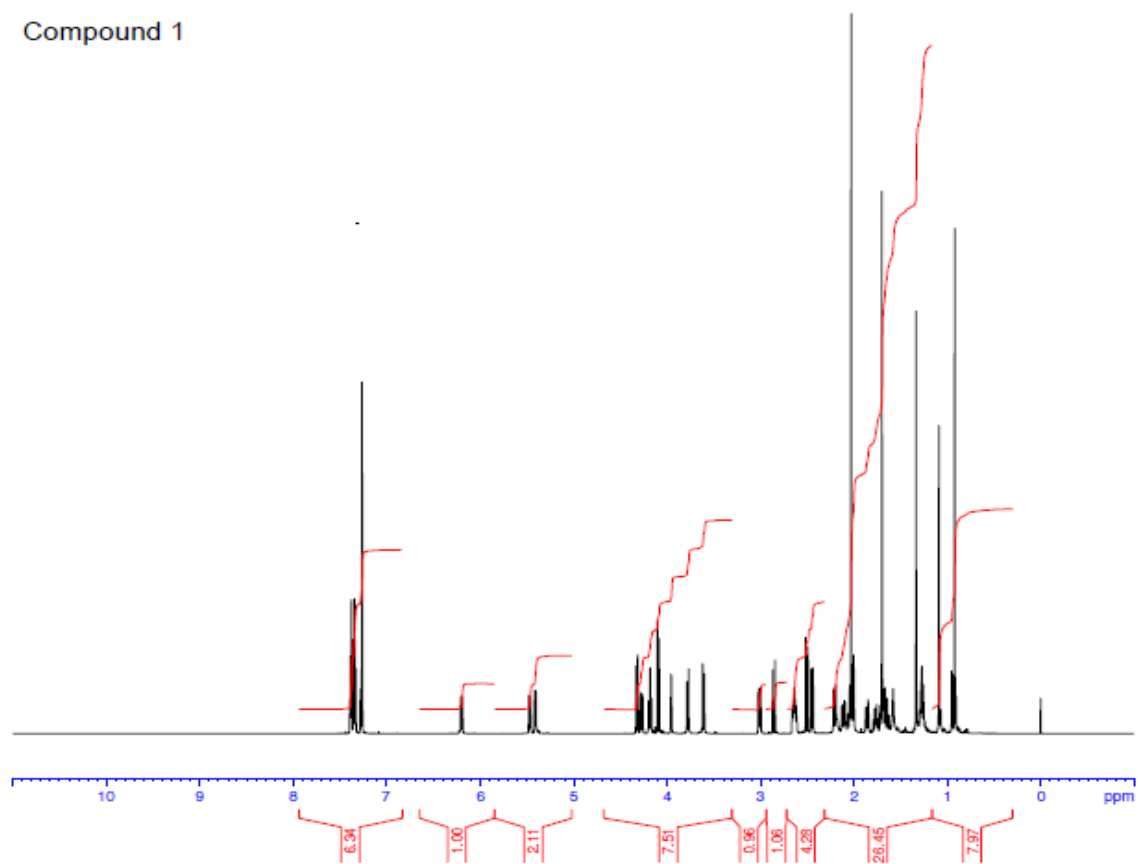

Current Data Parameters  
NAME Jun05-2014\_160\_1  
EXPNO 1  
PROCNO 1

F2 - Acquisition Parameters  
Date 20140605  
Time 16.35  
INSTRUM spect  
PROBHD 5 mm PATXI 1H/  
PULPROG zg30  
TD 65536  
SOLVENT CDCl<sub>3</sub>  
NS 64  
DS 0  
SWH 12376.237 Hz  
FIDRES 0.188846 Hz  
AQ 2.6476543 sec  
RG 80.6  
DW 40.400 usec  
DE 6.50 usec  
TE 300.0 K  
D1 1.0000000 sec  
TD0 1

==== CHANNEL f1 =====  
NUC1 1H  
P1 7.55 usec  
PL1 4.00 dB  
SFO1 600.1337060 MHz

F2 - Processing parameters  
SI 32768  
SF 600.1300113 MHz  
WDW no  
SSB 0  
LB 0 Hz  
GB 0  
PC 1.00

Figure S2. <sup>1</sup>H-NMR spectrum (600MHz, CDCl<sub>3</sub>, 303K) of compound 1

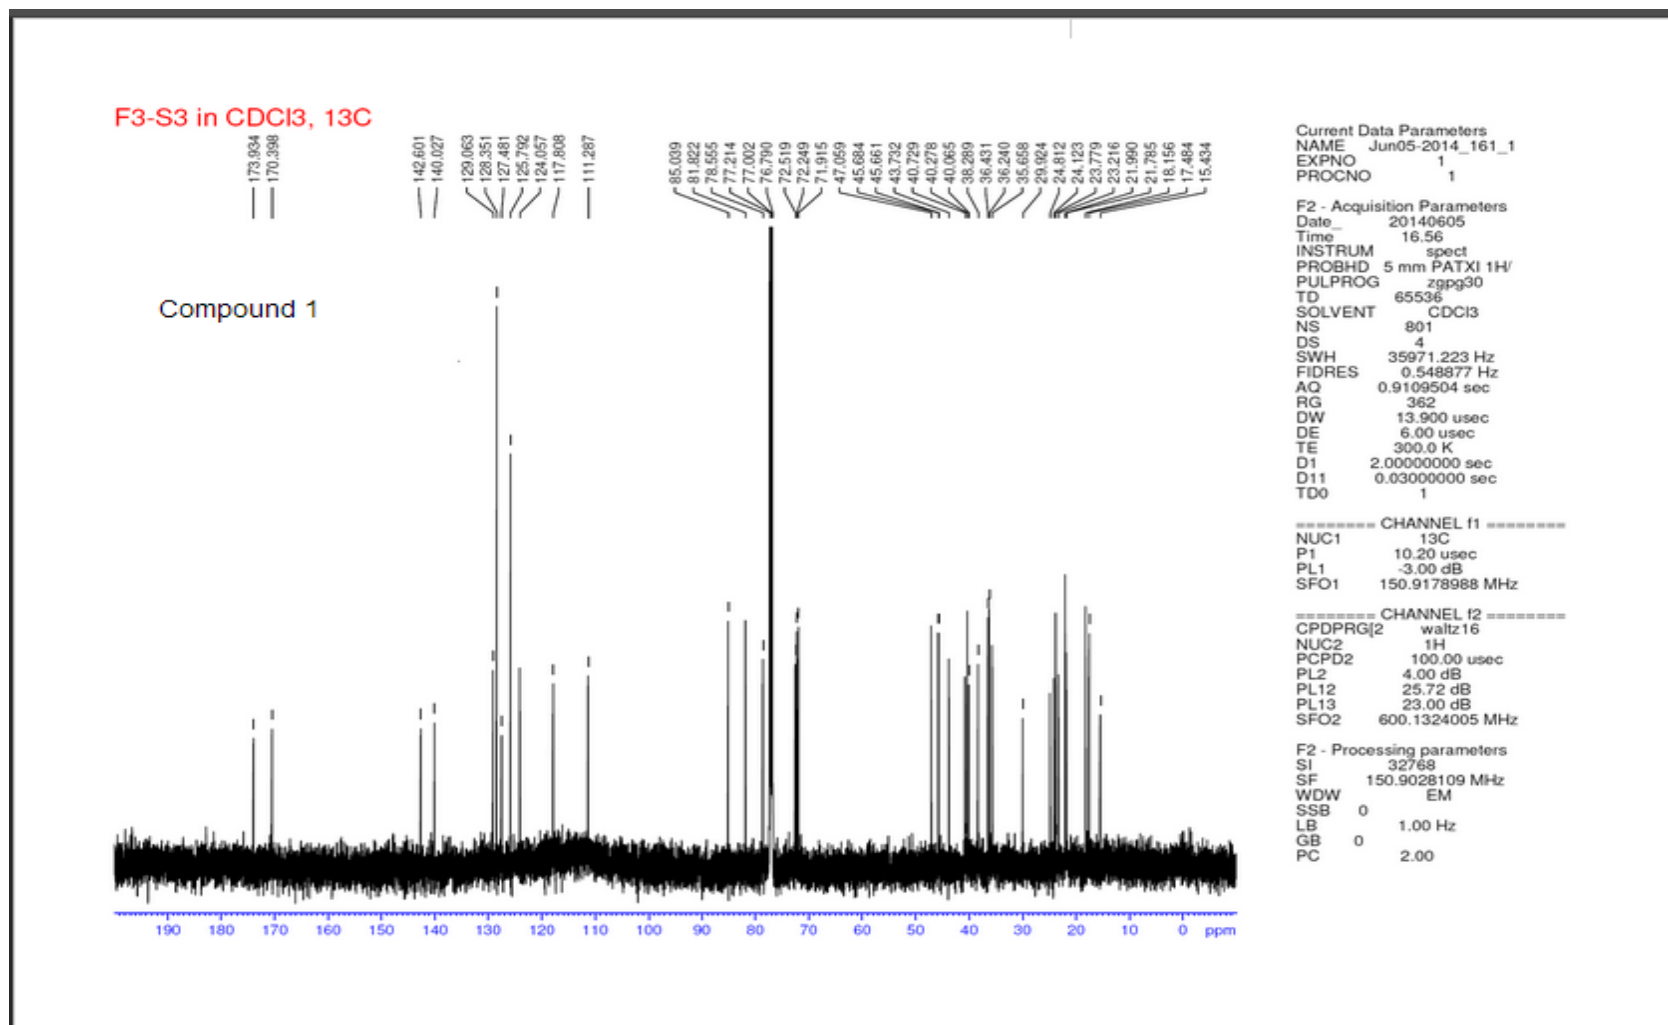

Figure S3. <sup>13</sup>C-NMR spectrum (150MHz, CDCl<sub>3</sub>, 303K) of compound 1

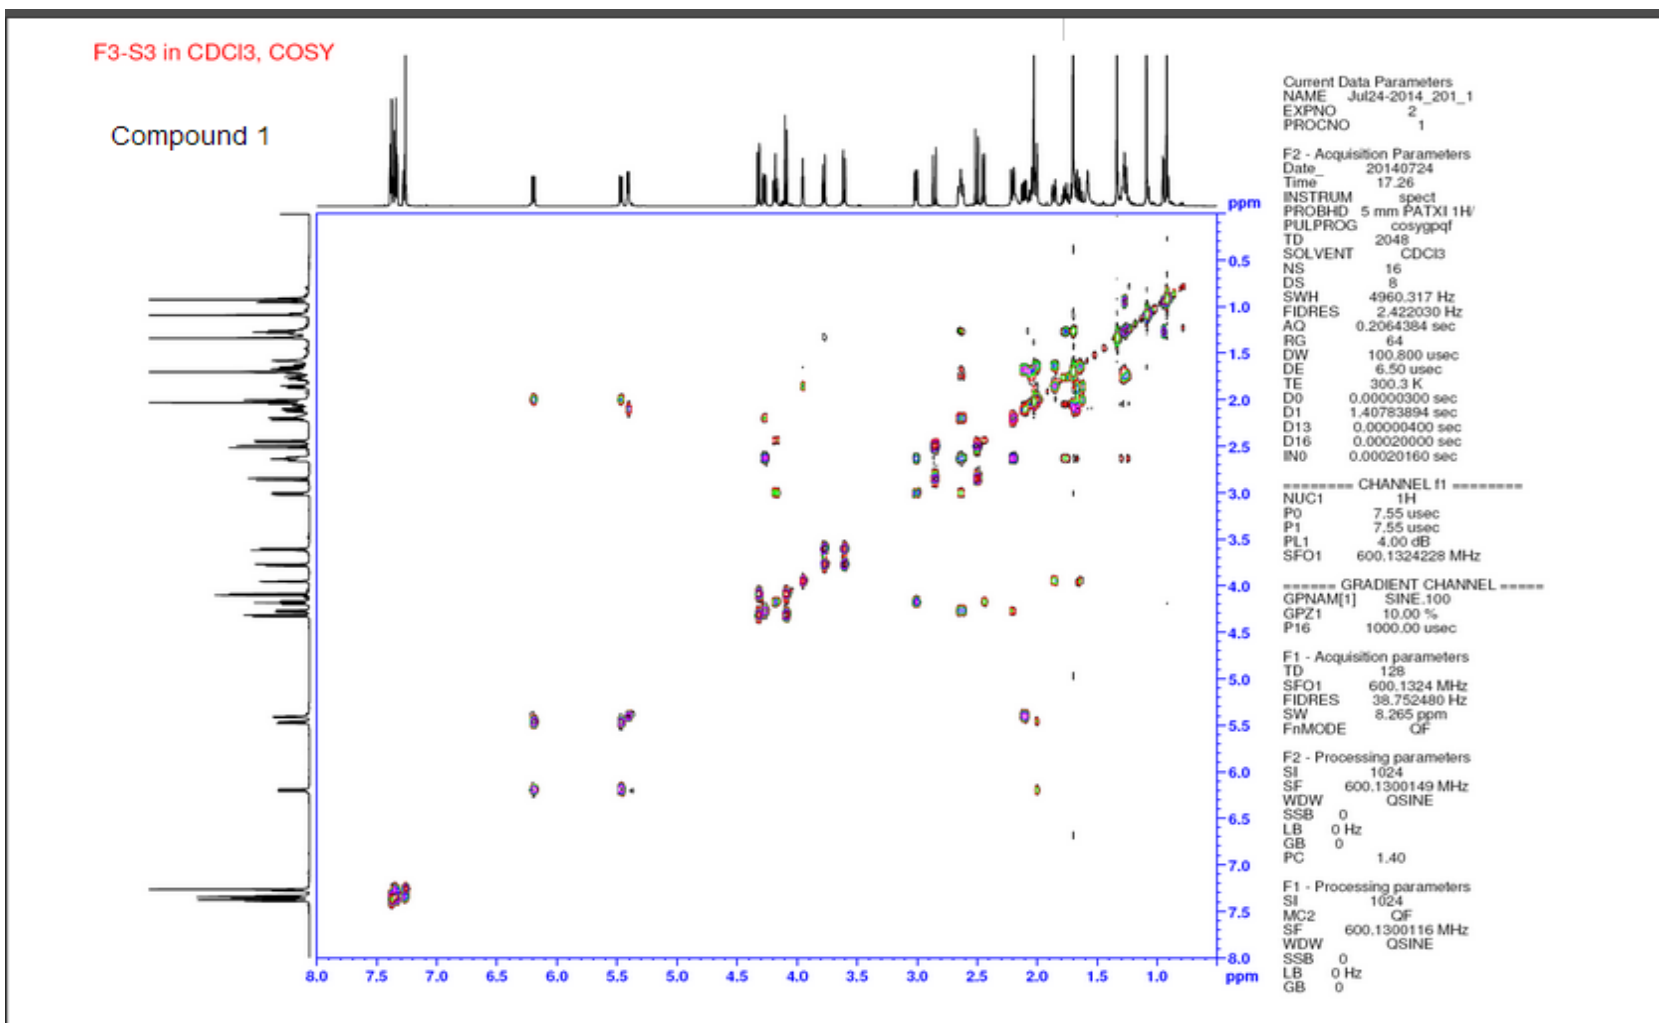

Figure S4. COSY spectrum (600MHz, CDCl<sub>3</sub>, 303K) of compound 1

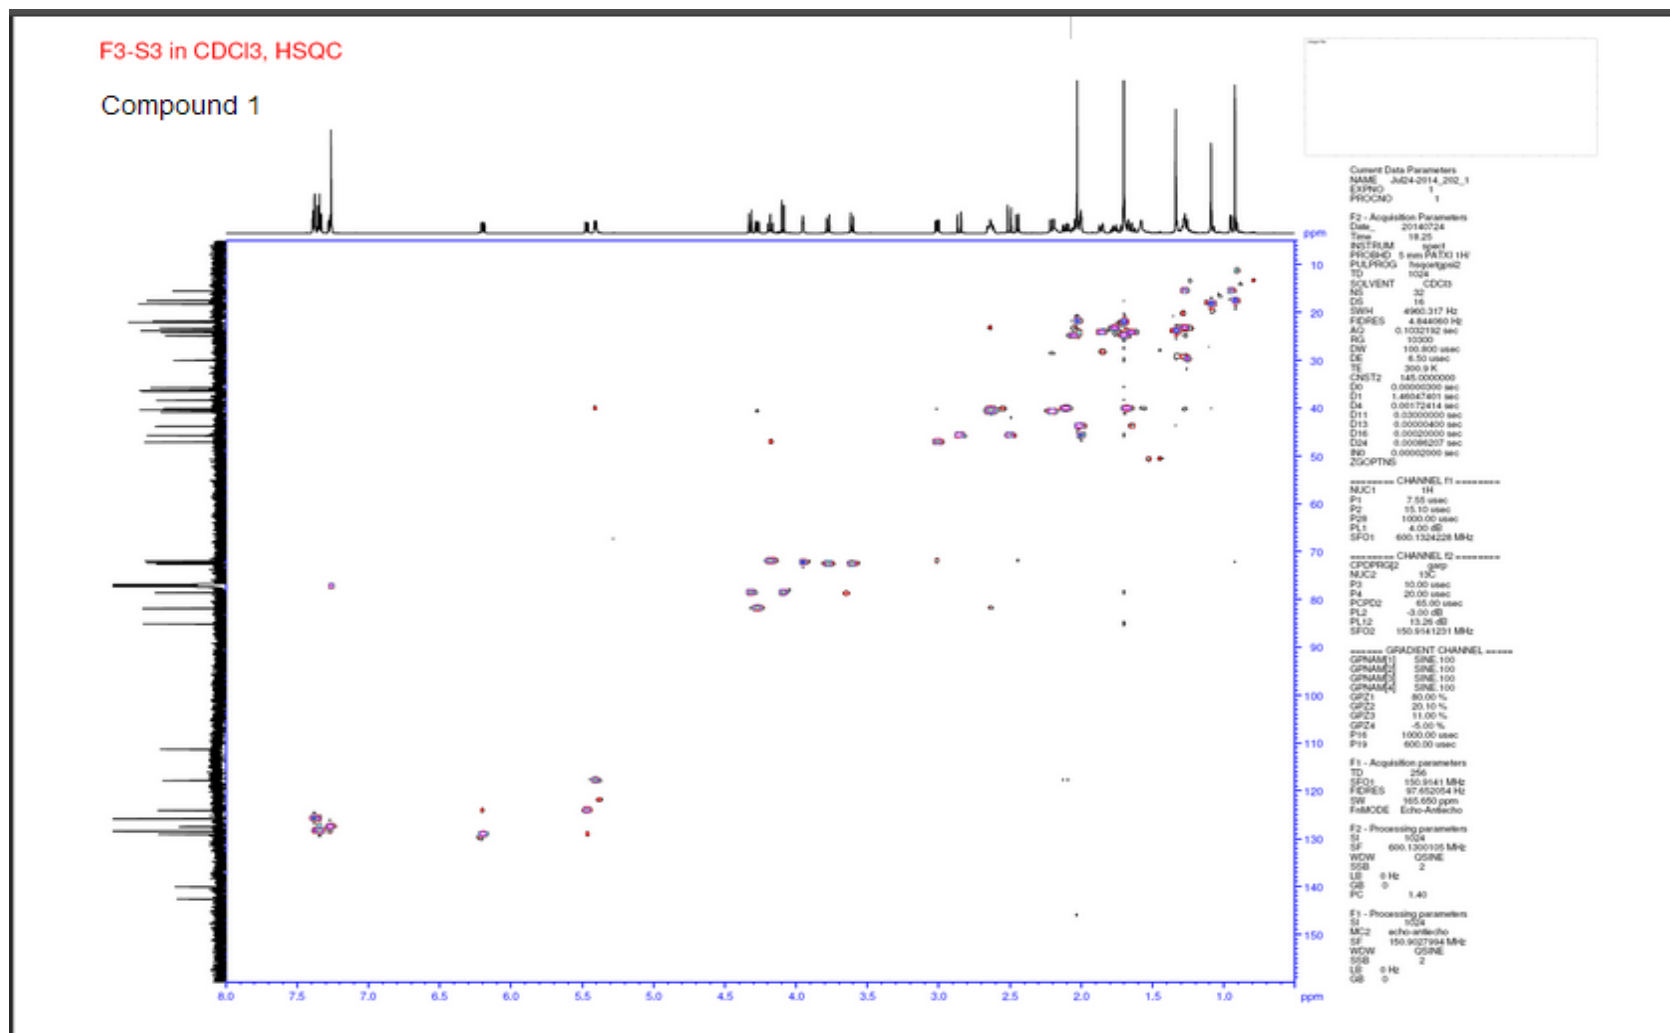

Figure S5. HSQC NMR spectrum (600MHz, CDCl<sub>3</sub>, 303K) of compound 1

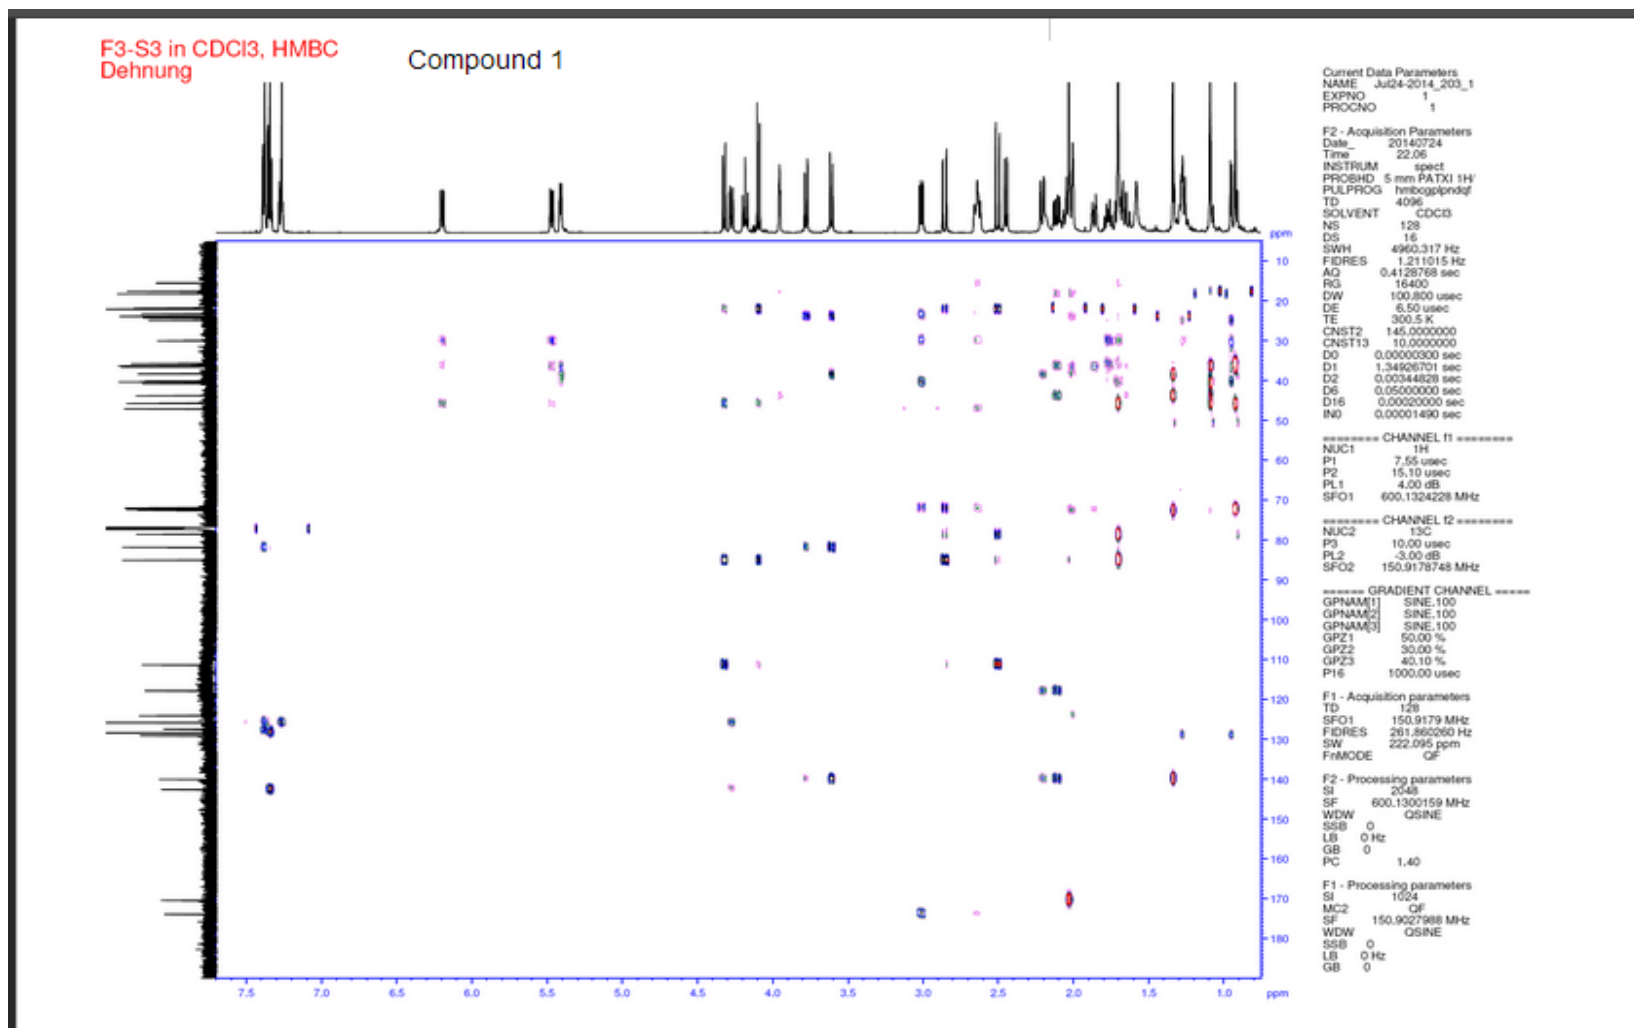

Figure S6. HMBC NMR spectrum (600MHz, CDCl<sub>3</sub>, 303K) of compound 1



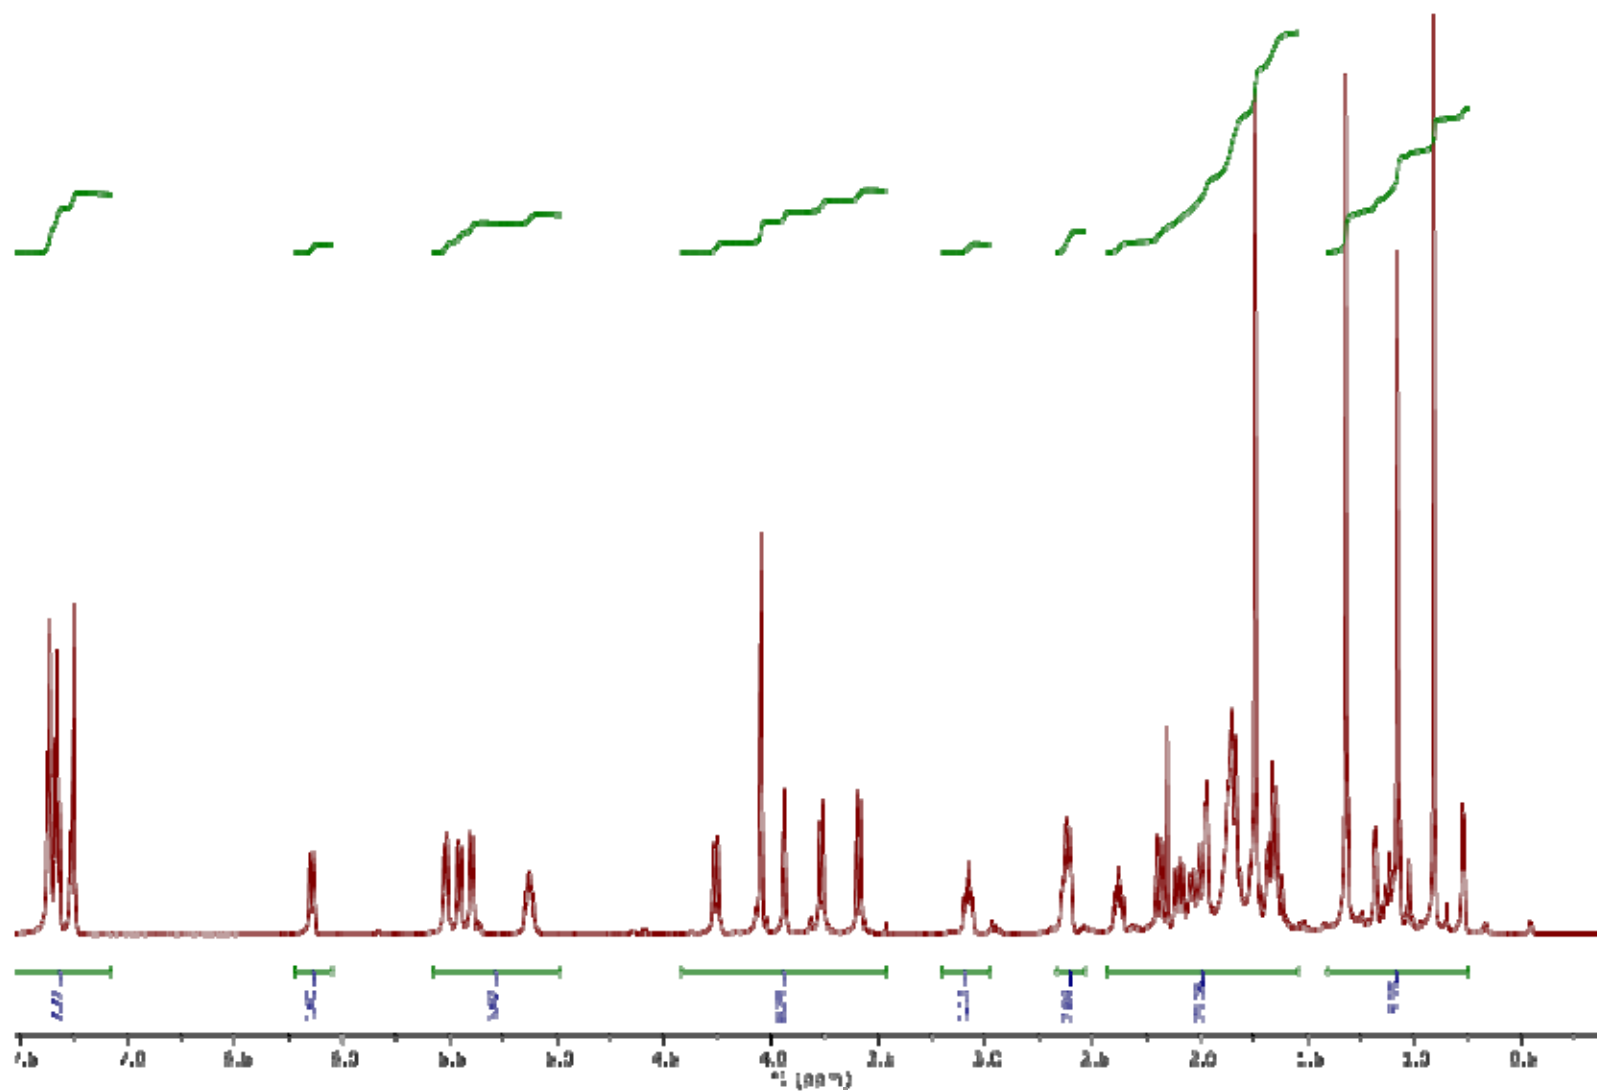

Figure S7.  $^1\text{H}$  NMR spectrum (600MHz,  $\text{CDCl}_3$ , 303K) of compound 2

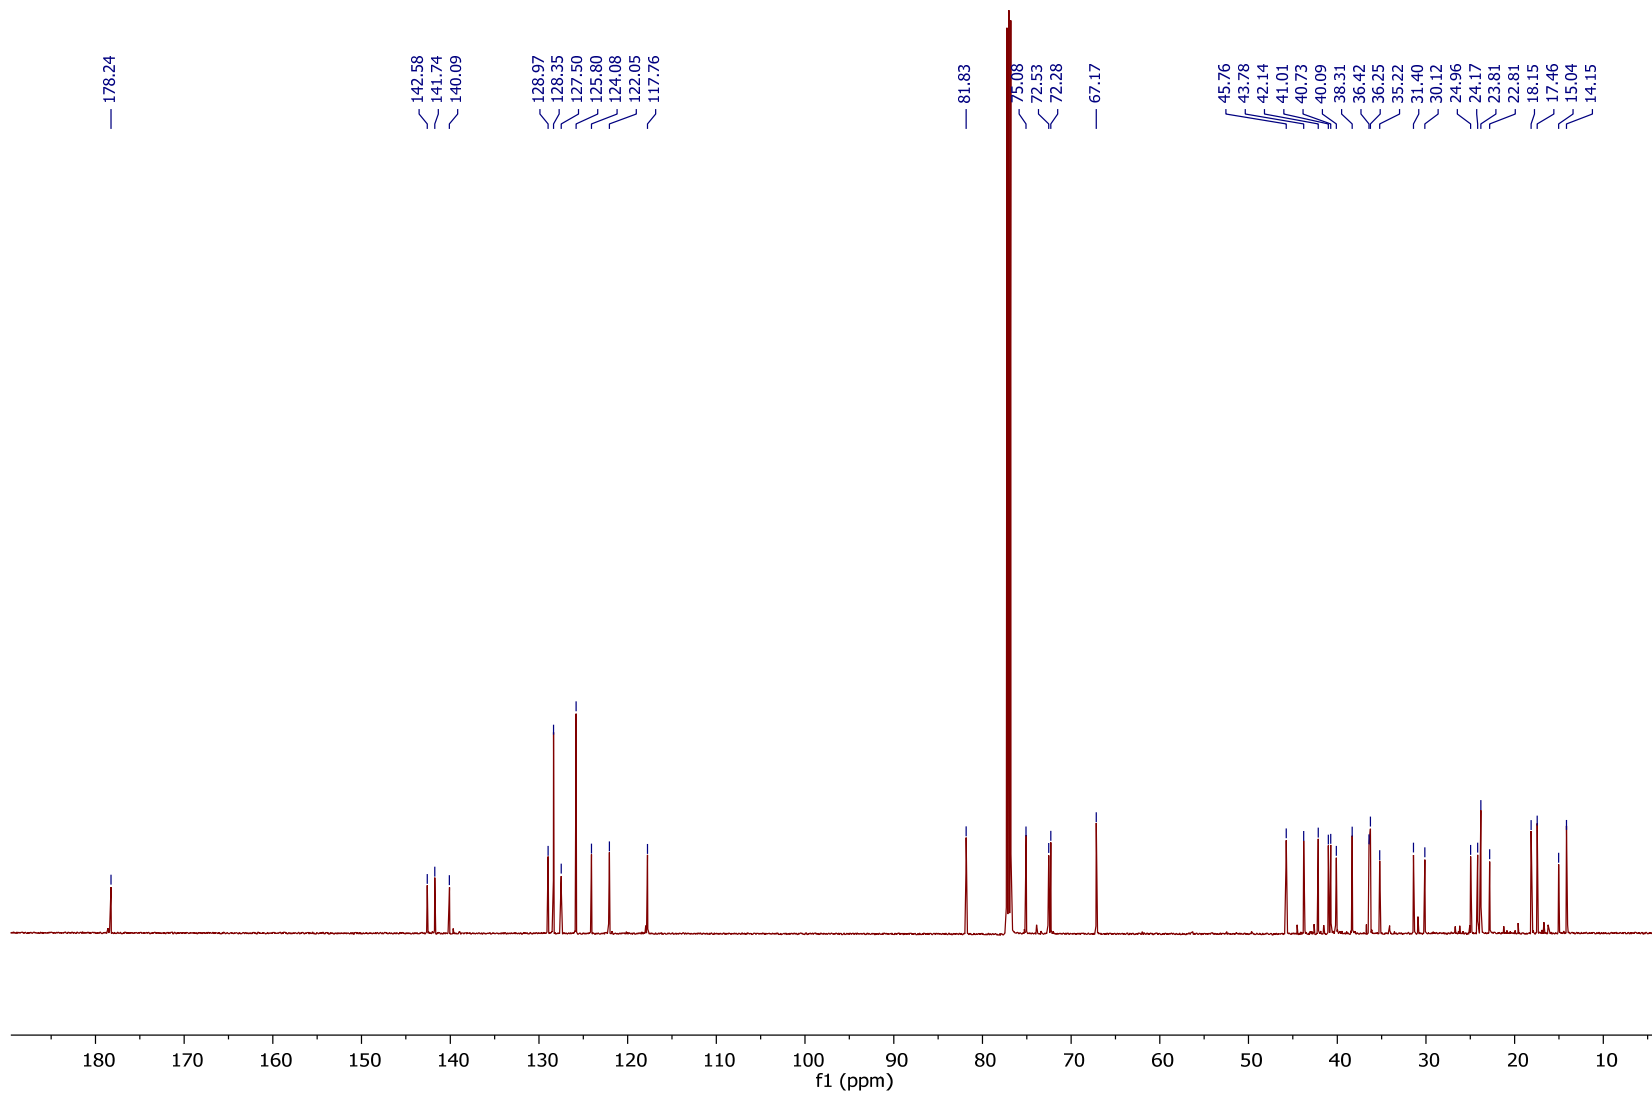

Figure S8. <sup>13</sup>C-NMR spectrum (150MHz, CDCl<sub>3</sub>, 303K) of compound 2

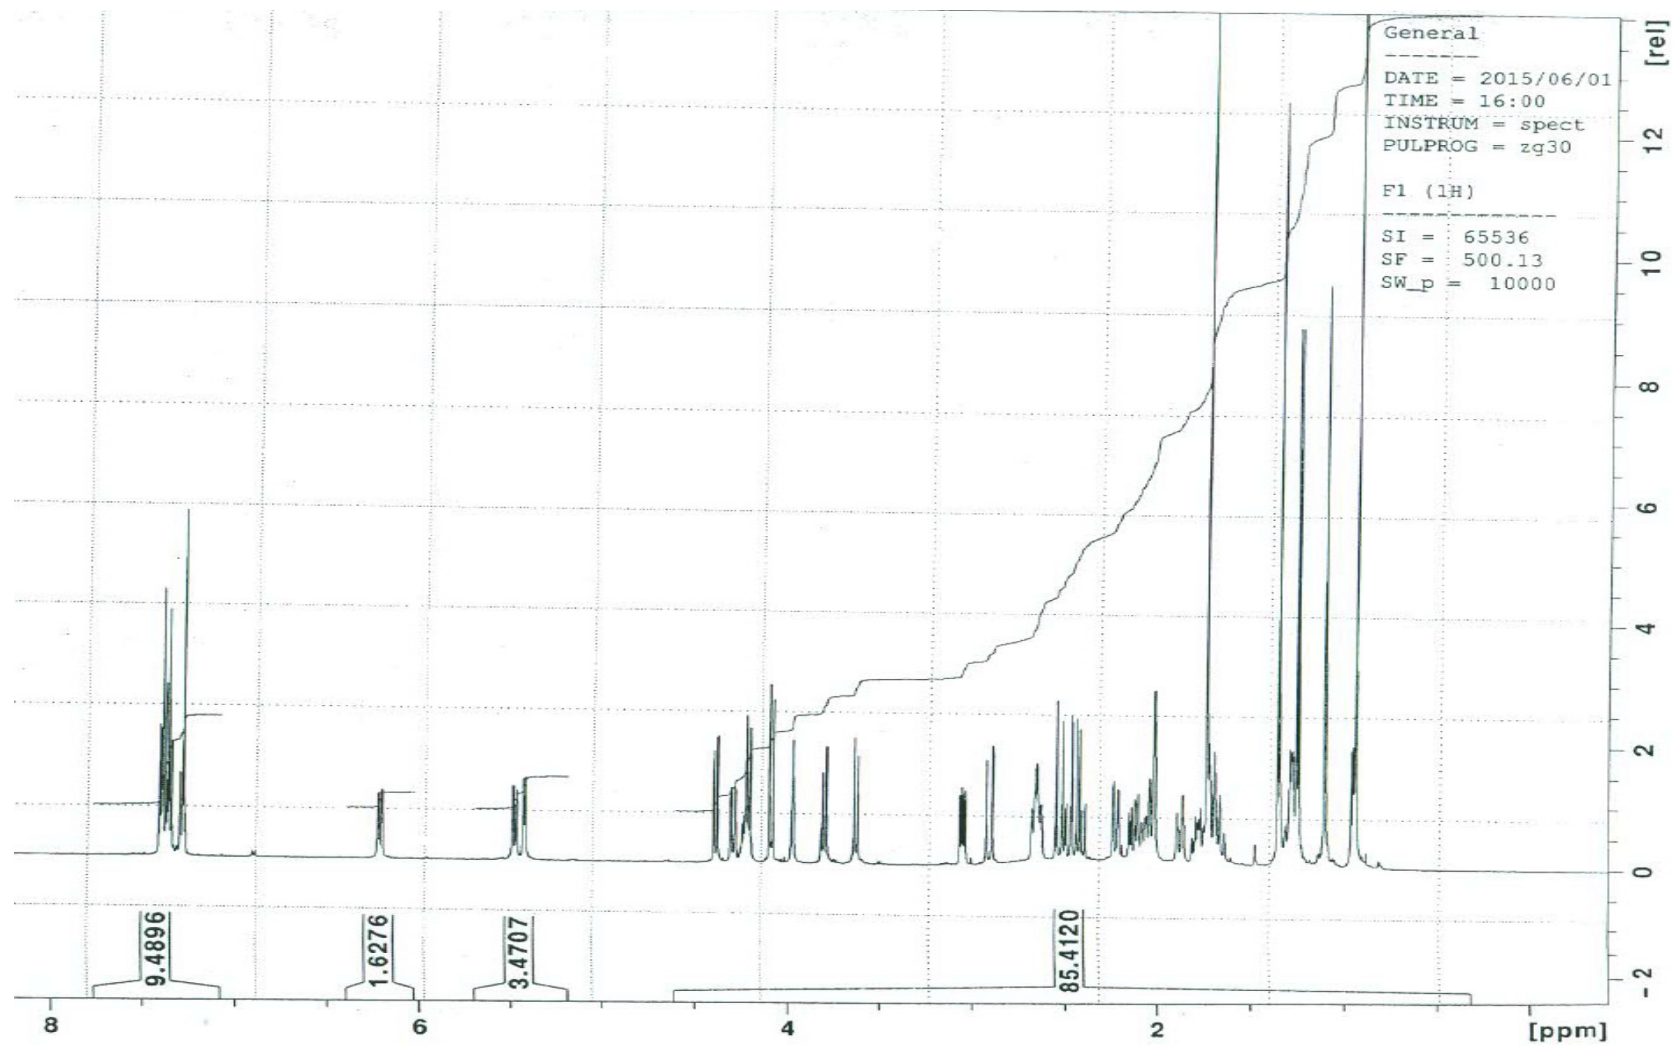

Figure S9.  $^1\text{H}$  NMR spectrum (600MHz,  $\text{CDCl}_3$ , 303K) of compound 3

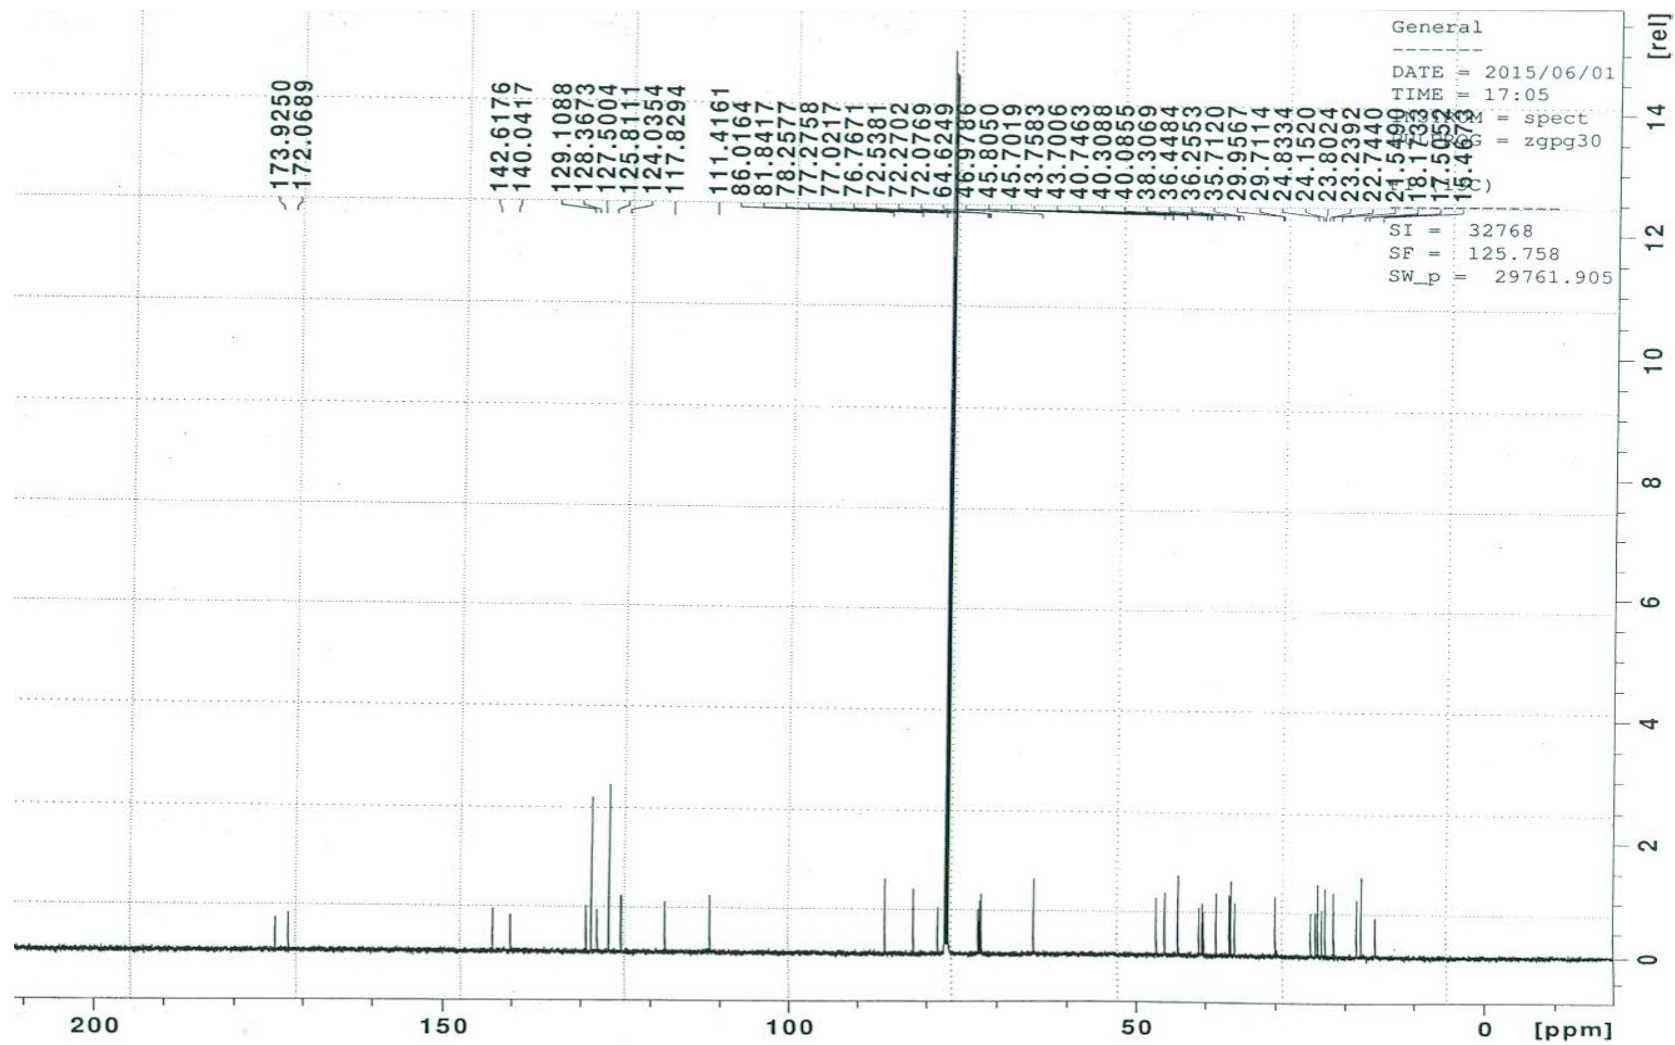

Figure S10.  $^{13}\text{C}$  NMR spectrum (150MHz,  $\text{CDCl}_3$ , 303K) of compound 3

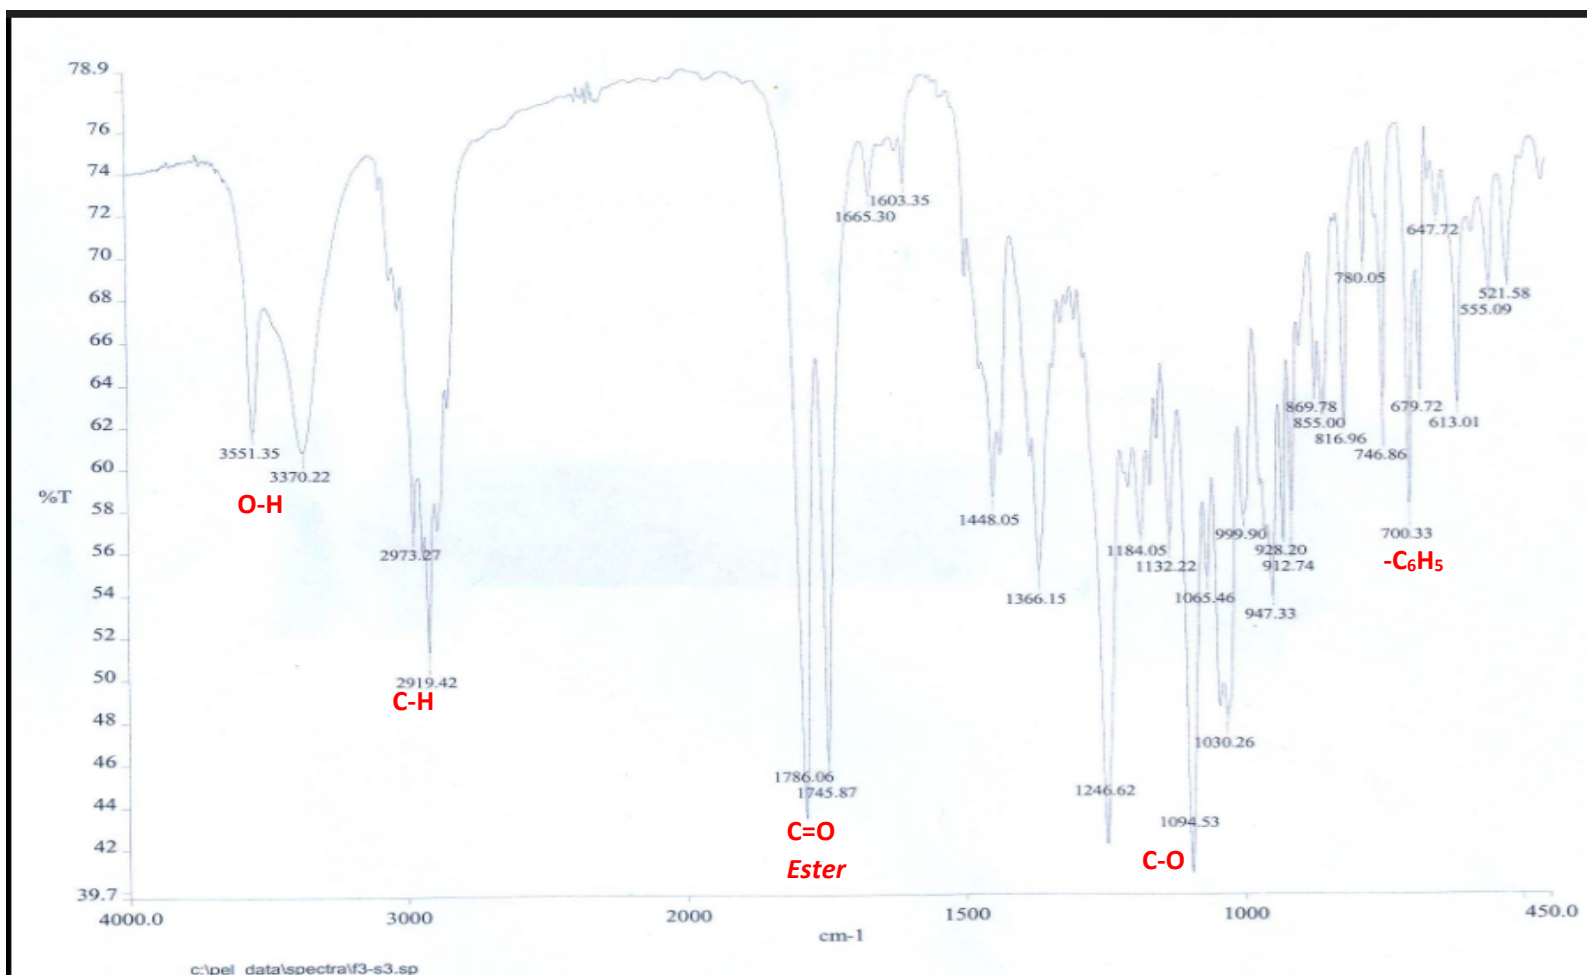

Figure S11. IR spectrum of compound 1

**Table S1.** Jurkat cell viability assay data for compounds **1 - 3**

| Concentration<br>( $\mu$ M) | 7-hydroxy dichapetalin P ( <b>1</b> ) | Dichapetalin A ( <b>2</b> ) | Dichapetalin X ( <b>3</b> ) | Curcumin           |
|-----------------------------|---------------------------------------|-----------------------------|-----------------------------|--------------------|
|                             | Cell viability (%)                    | Cell viability (%)          | Cell viability (%)          | Cell viability (%) |
| 3.125                       | 58.1                                  | 64.0                        | 46.5                        | 65.6               |
| 6.25                        | 60.5                                  | 35.2                        | 24.9                        | 47.5               |
| 12.5                        | 62.5                                  | 25.5                        | 4.5                         | 37.8               |
| 25                          | 48.8                                  | 14.4                        | 2.0                         | 11.3               |
| 50                          | 0.0                                   | 0.0                         | 0.0                         | 0.0                |

**Table S2.** HL-60 cell viability assay data for compounds **1 - 3**

| Concentration<br>( $\mu$ M) | 7-hydroxy dichapetalin P ( <b>1</b> ) | Dichapetalin A ( <b>2</b> ) | Dichapetalin X ( <b>3</b> ) | Curcumin           |
|-----------------------------|---------------------------------------|-----------------------------|-----------------------------|--------------------|
|                             | Cell viability (%)                    | Cell viability (%)          | Cell viability (%)          | Cell viability (%) |
| 3.125                       | 78.4                                  | 74.8                        | 77.5                        | 97.9               |
| 6.25                        | 71.3                                  | 67.4                        | 55.0                        | 92.5               |
| 12.5                        | 72.4                                  | 46.0                        | 4.0                         | 67.9               |
| 25                          | 59.5                                  | 16.0                        | 1.7                         | 25.9               |
| 50                          | 9.2                                   | 0.0                         | 2.2                         | 0.0                |

**Table S3.** CEM cell viability assay data for compounds **1 - 3**

| Concentration<br>( $\mu$ M) | 7-hydroxy dichapetalin P ( <b>1</b> ) | Dichapetalin A ( <b>2</b> ) | Dichapetalin X ( <b>3</b> ) | Curcumin           |
|-----------------------------|---------------------------------------|-----------------------------|-----------------------------|--------------------|
|                             | Cell viability (%)                    | Cell viability (%)          | Cell viability (%)          | Cell viability (%) |
| 3.125                       | 69.0                                  | 66.4                        | 58.5                        | 87.7               |
| 6.25                        | 60.6                                  | 58.7                        | 31.2                        | 85.8               |
| 12.5                        | 63.8                                  | 43.1                        | 3.8                         | 74.8               |
| 25                          | 48.7                                  | 15.5                        | 4.5                         | 35.6               |
| 50                          | 5.6                                   | 0.0                         | 0.0                         | 0.0                |
